# Supplementary material for: An updated parameterization of the unstable atmospheric surface layer in the Weather Research and Forecasting (WRF) modeling system
Source: Copernicus journal article supplement (doi:10.5194/gmd-17-8093-2024), 2024-11-14
Supplement: Supplementary file 1 [file gmd-17-8093-2024-supplement.pdf]

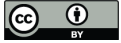

*Supplement of*

## **An updated parameterization of the unstable atmospheric surface layer in the Weather Research and Forecasting (WRF) modeling system**

**Prabhakar Namdev et al.**

*Correspondence to:* Prabhakar Namdev ([prabhakarnmdv587@gmail.com](mailto:prabhakarnmdv587@gmail.com))

The copyright of individual parts of the supplement might differ from the article licence.

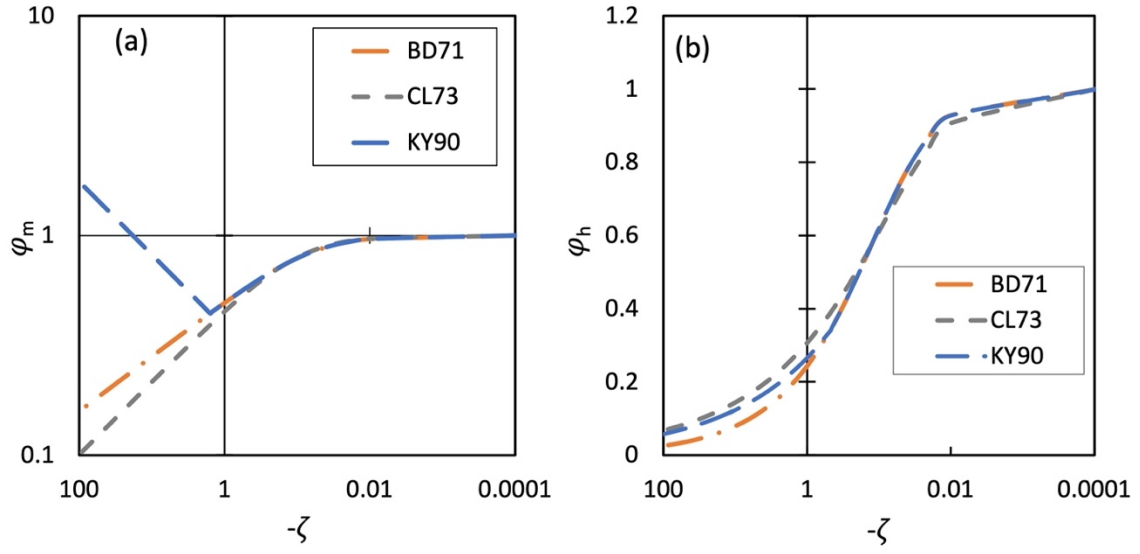

**Figure S1.** Variation of different functional forms of  $\varphi_m$  and  $\varphi_h$  with respect to  $-\zeta$  utilized in this study based on the different classes.

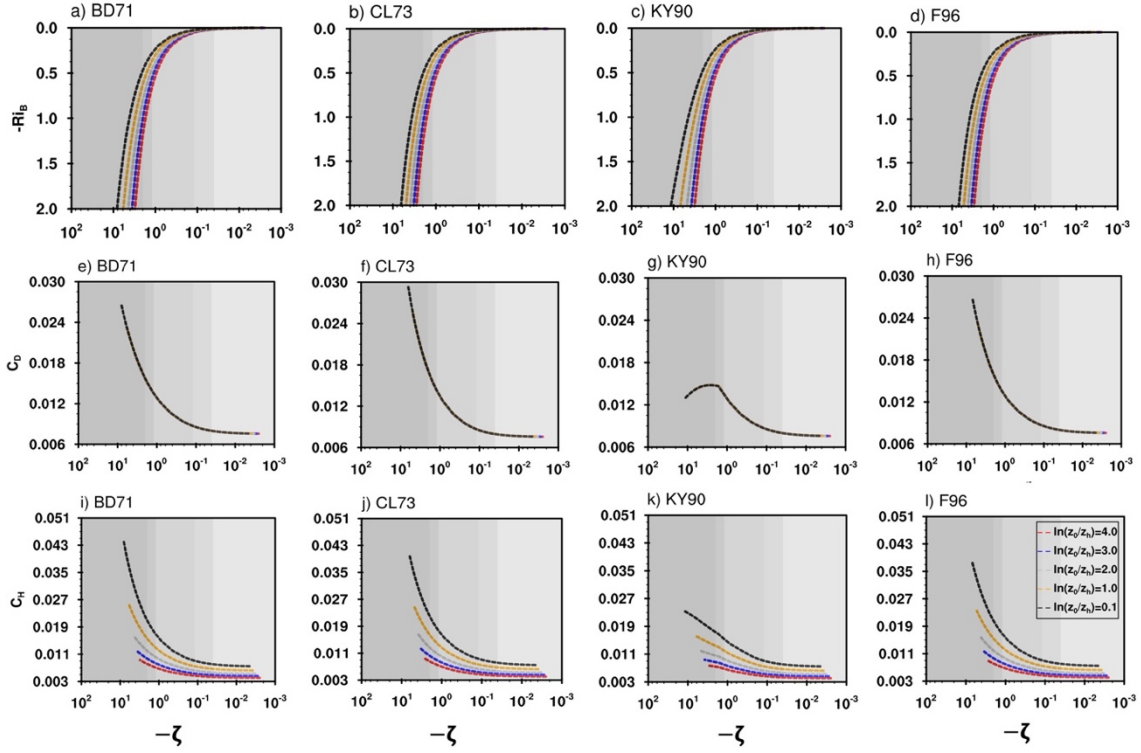

**Figure S2.** Variation of  $\zeta$  with  $Ri_B$  (upper panel),  $C_D$  (middle panel) and  $C_H$  (lower panel) with  $\zeta$  calculated from bulk flux algorithm (offline simulation) for different functional forms of similarity functions corresponding to BD71, CL73, KY90, and F96 forms for different values of  $z_h$  for the case when  $z_0 = 0.1$  m. The background color corresponds to different sublayers in convective conditions (Kader and Yaglom 1990), from the dynamic sublayer ( $0 \geq \zeta > -0.04$ ; light grey) to the free convective sublayer ( $\zeta < -2$ ; dark grey).

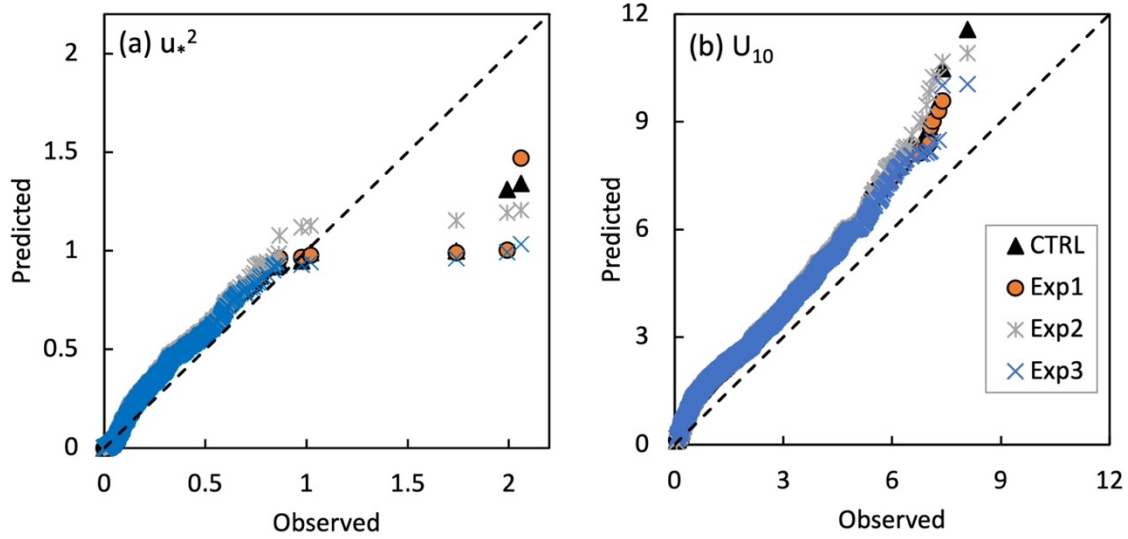

**Figure S3.** Q-Q plot for model simulated (a)  $u_*^2$ , and (b)  $U_{10}$  from different experiments and CTRL simulation with respect to the observational data derived from the flux tower at Ranchi (India) during MAM season (2009).

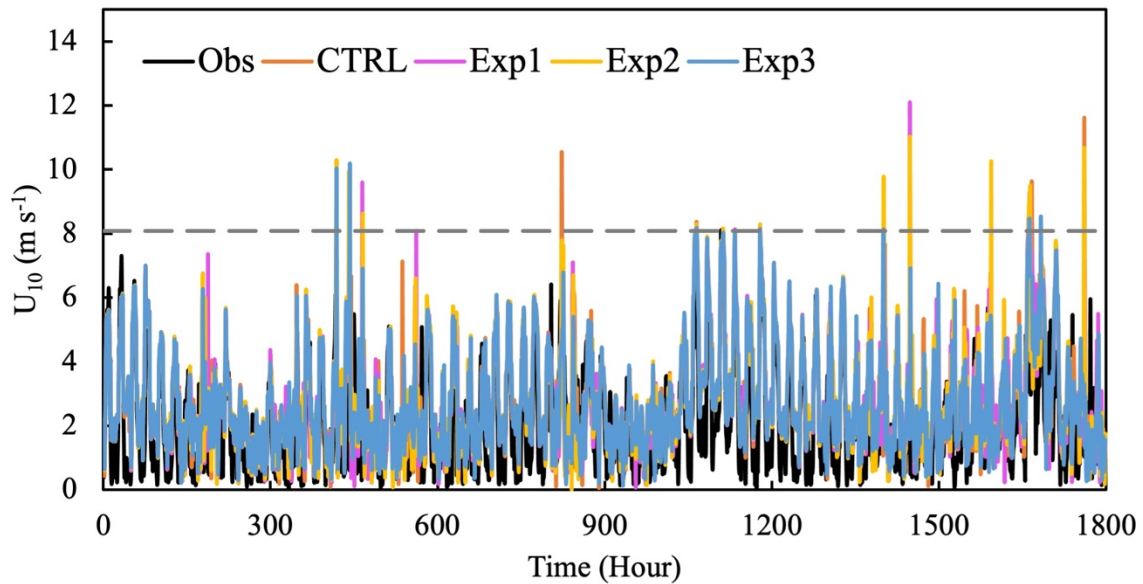

**Figure S4.** Time variation of 10-m wind speed predicted from different similarity functions in the surface layer scheme of WRF model. The maximum value of wind speed in observational data is shown by dotted grey line.

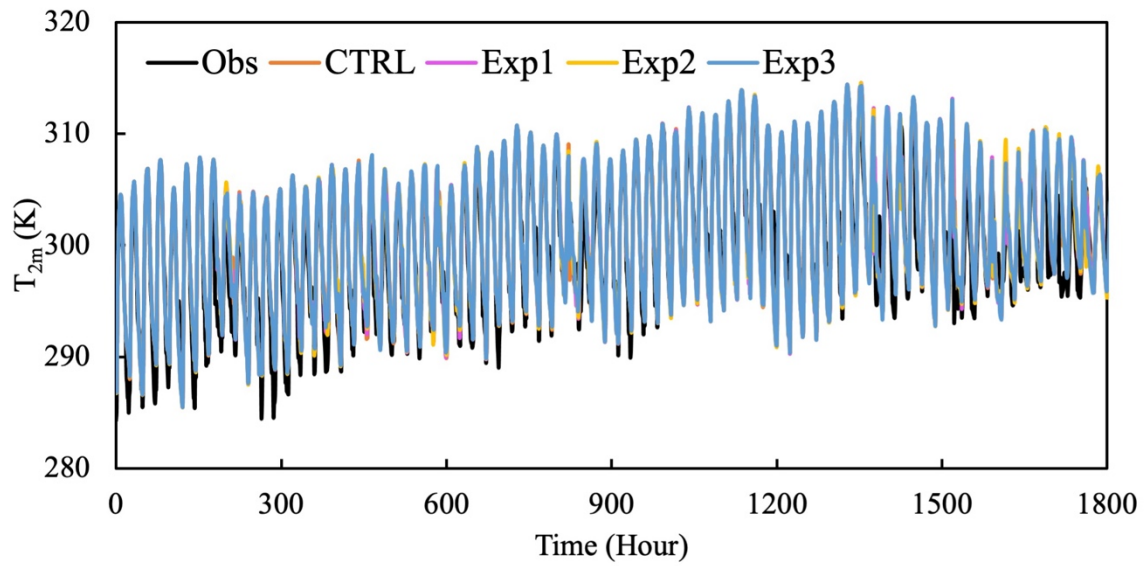

**Figure S5.** Time variation of 2-m temperature predicted from different similarity functions in the surface layer scheme of WRF model.

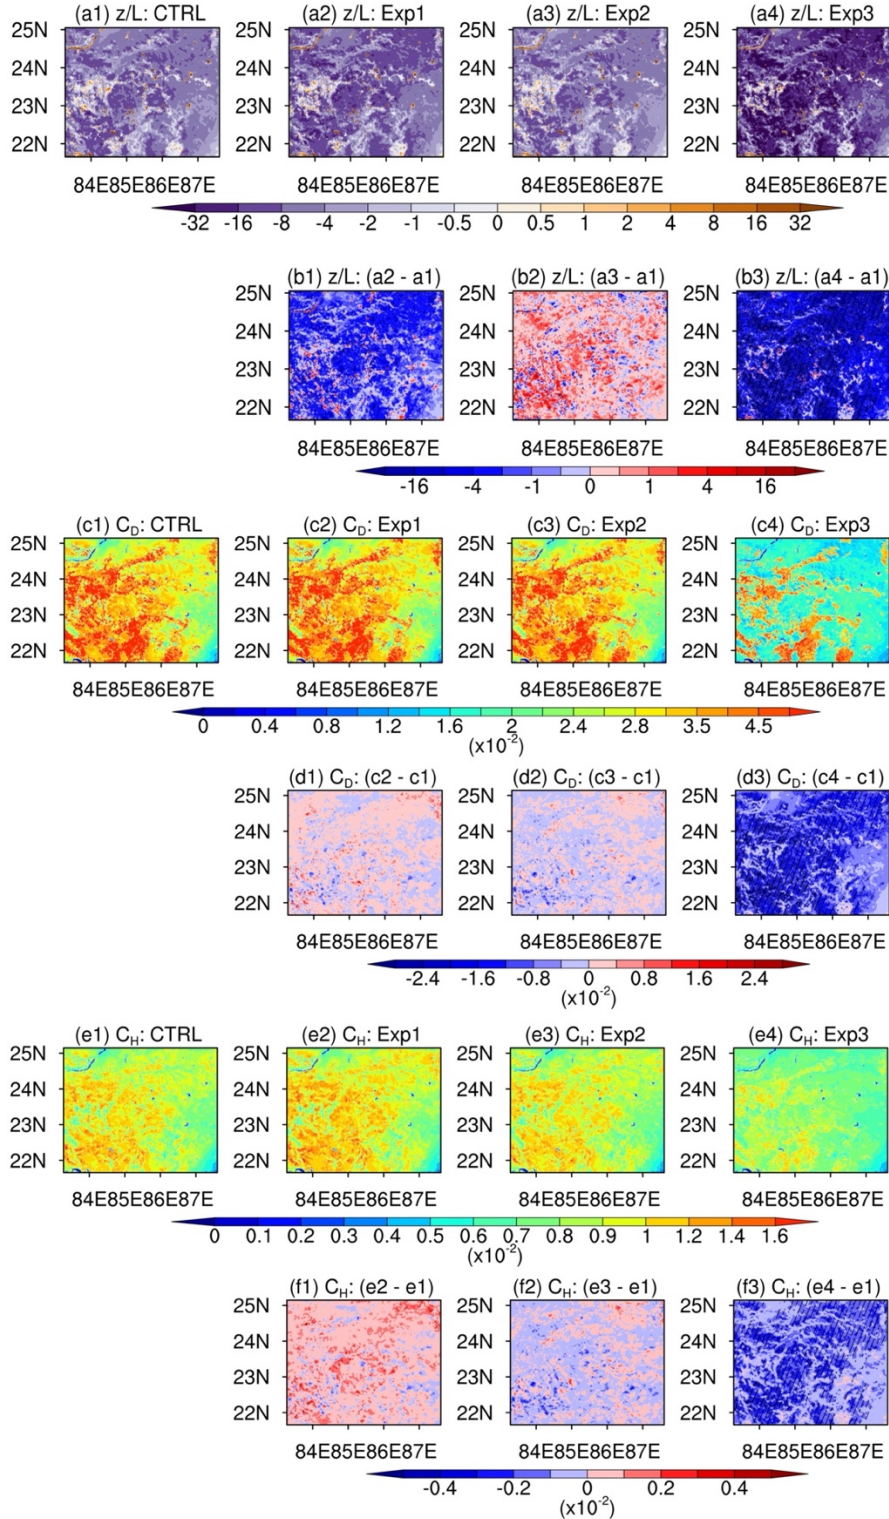

**Figure S6:** Mean spatial distribution of model simulated  $\zeta$  (1<sup>st</sup> row),  $C_D$  (2<sup>nd</sup> row) and  $C_H$  (3<sup>rd</sup> row) from different experiments and their differences with respect to CTRL simulation averaged during strong unstable conditions (hours during daytime in which  $\zeta$  is smaller than  $-10$ ) for whole simulation period. Hatched regions show significant differences at 95% confidence level in experiments with respect to CTRL simulation.

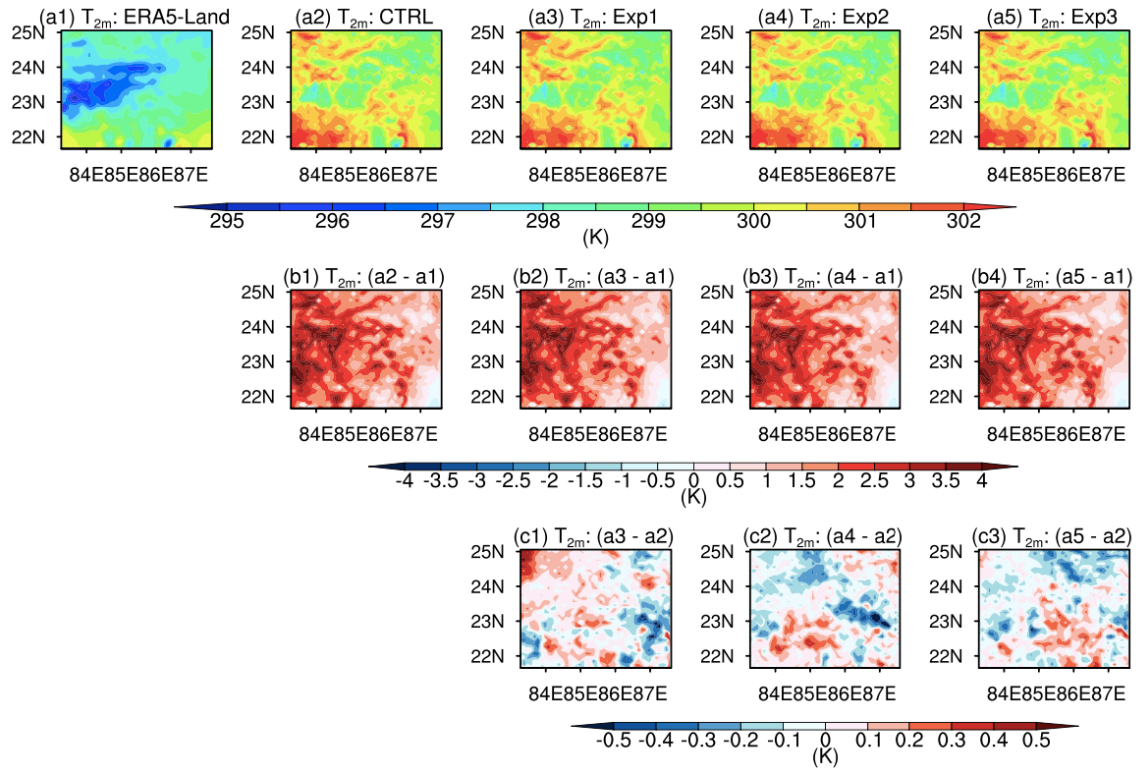

**Figure S7:** Mean spatial distribution of  $T_{2m}$  from ERA5 land reanalysis (a1) and simulated using different experiments (a2-a5) and their differences with respect to ERA5 land reanalysis data (b1-b4) averaged during strong unstable regime (hours during daytime in which  $\zeta$  is smaller than  $-10$ ) for whole simulation period. The differences between different experiments and CTRL simulation are shown in last row (c1-3).

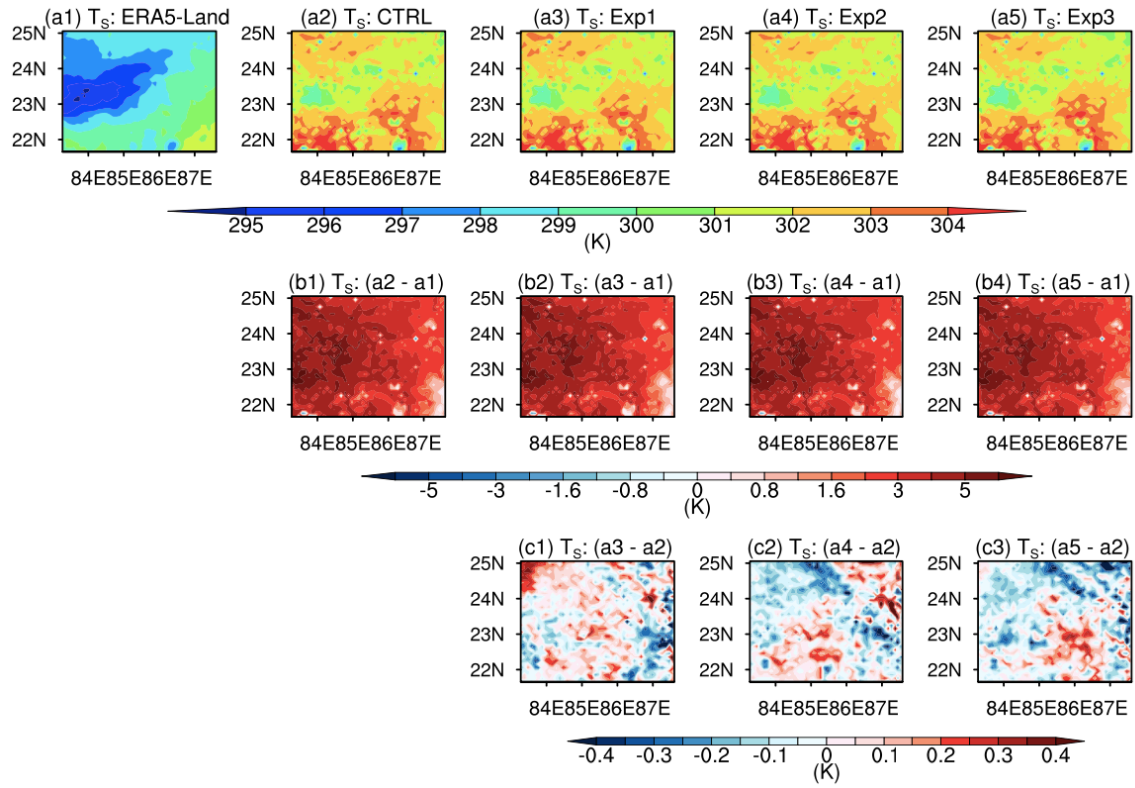

**Figure S8:** Same as Figure S7 but for  $T_s$ .



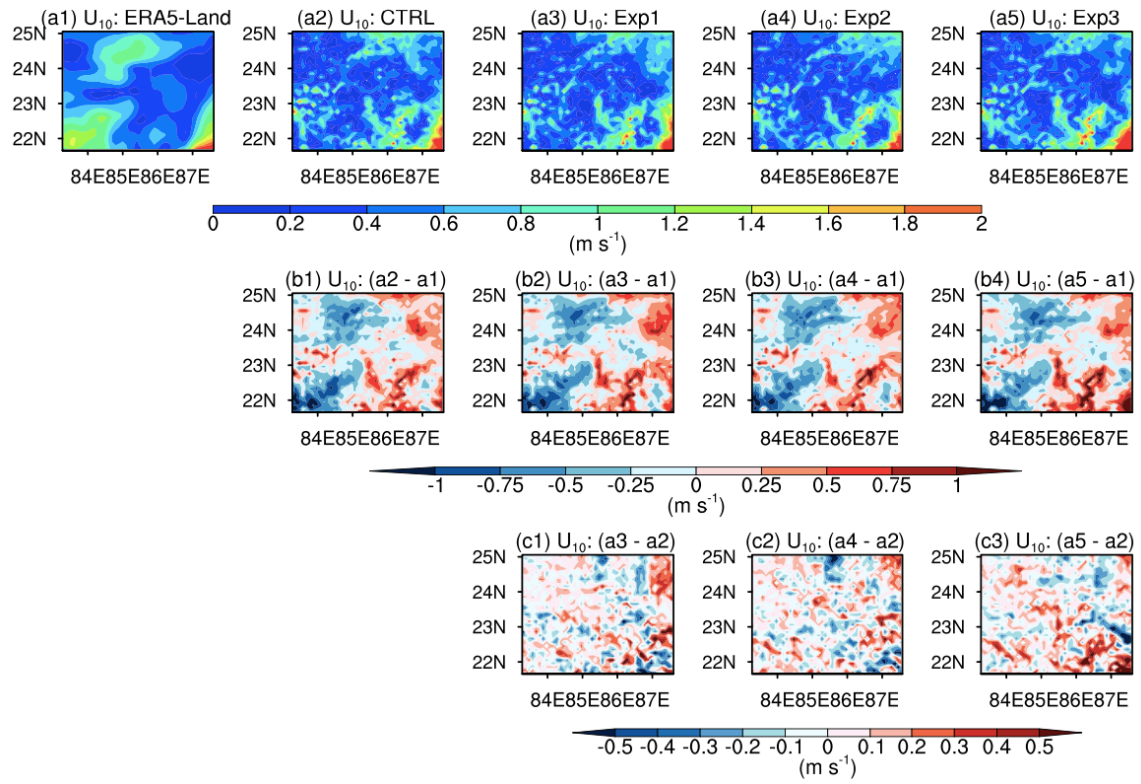

**Figure S9:** Same as Figure S7 but for  $U_{10}$ .

| MAM                                                  |      | Bias (%) | RMSE  | PCC  |
|------------------------------------------------------|------|----------|-------|------|
| <b>SHF (<math>\text{W m}^{-2}</math>)</b>            | CTRL | 7.09     | 37.37 | 0.47 |
|                                                      | Exp1 | 7.04     | 37.42 | 0.47 |
|                                                      | Exp2 | 7.12     | 37.44 | 0.46 |
|                                                      | Exp3 | 7.17     | 37.42 | 0.48 |
| <b>LHF (<math>\text{W m}^{-2}</math>)</b>            | CTRL | -33.54   | 50.70 | 0.39 |
|                                                      | Exp1 | -33.54   | 50.70 | 0.38 |
|                                                      | Exp2 | -33.58   | 50.72 | 0.39 |
|                                                      | Exp3 | -33.55   | 50.71 | 0.38 |
| <b>T<sub>2m</sub> (K)</b>                            | CTRL | 0.24     | 1.26  | 0.72 |
|                                                      | Exp1 | 0.24     | 1.26  | 0.72 |
|                                                      | Exp2 | 0.24     | 1.26  | 0.72 |
|                                                      | Exp3 | 0.25     | 1.27  | 0.72 |
| <b>T<sub>s</sub> (K)</b>                             | CTRL | 0.51     | 2.75  | 0.50 |
|                                                      | Exp1 | 0.51     | 2.76  | 0.50 |
|                                                      | Exp2 | 0.51     | 2.76  | 0.50 |
|                                                      | Exp3 | 0.50     | 2.75  | 0.51 |
| <b>U<sub>10</sub> (<math>\text{m s}^{-1}</math>)</b> | CTRL | 32.28    | 0.54  | 0.89 |
|                                                      | Exp1 | 32.12    | 0.54  | 0.90 |
|                                                      | Exp2 | 31.18    | 0.54  | 0.89 |
|                                                      | Exp3 | 32.06    | 0.53  | 0.91 |

**Table S1:** Comparison statistics for SHF ( $\text{W m}^{-2}$ ), LHF ( $\text{W m}^{-2}$ ), T<sub>2m</sub> (K), T<sub>s</sub> (K), and U<sub>10</sub> ( $\text{m s}^{-1}$ ) simulated using different experiments together with CTRL simulation with respect to ERA5 land reanalysis data averaged during daytime for the entire simulation period. The mean bias (%), pattern correlation coefficient (PCC), and root mean square error (RMSE) are shown.
